# Supplementary material for: Viruses as Sole Causative Agents of Severe Acute Respiratory Tract Infections in Children
Source: PubMed Central journal article supplement (PMC4786225; doi:10.1371/journal.pone.0150776), 2016-03-10
Supplement: pone.0150776.s002.pdf [file pone.0150776.s002.pdf]

S1 Table

| Viruses detected                   | Reason for admission PICU-non-SARI patients |                      |                         |           |                   |                          |                                                 |                                   |         |                     |                             |                             | Total |
|------------------------------------|---------------------------------------------|----------------------|-------------------------|-----------|-------------------|--------------------------|-------------------------------------------------|-----------------------------------|---------|---------------------|-----------------------------|-----------------------------|-------|
|                                    | ART sample obtained >72 hours               | Respiratory non-ARTI | Cardio-vascular disease | Neurology | Gastro-intestinal | Anatomical malformations | Sepsis like illness / severe systemic infection | Neurologic fever / encephalopathy | Others* | Metabolic disorders | Skeletal-muscular disorders | Insufficient data available |       |
| <b>Number of patients</b>          | n=53 (%)                                    | n=13 (%)             | n=19 (%)                | n=16 (%)  | n=7 (%)           | n=7 (%)                  | n=6 (%)                                         | n=3 (%)                           | n=3 (%) | n=3 (%)             | n=1 (%)                     | n=34 (%)                    | 165   |
| <b>Rhinovirus</b>                  | 18 (34)                                     | 4 (31)               | 9 (47)                  | 4 (25)    | 5 (71)            | 1 (14)                   | 2 (33)                                          | 1 (33)                            | 3 (100) |                     |                             | 13 (38)                     | 60    |
| <b>Respiratory syncytial virus</b> | 12 (23)                                     | 4 (31)               | 2 (11)                  | 2 (13)    | 1 (14)            | 4 (57)                   |                                                 |                                   |         |                     |                             | 5 (15)                      | 30    |
| <b>Adenovirus</b>                  | 7 (13)                                      |                      | 2 (11)                  | 3 (19)    |                   | 1 (14)                   | 1 (17)                                          | 1 (33)                            |         | 1 (33)              |                             | 5 (15)                      | 21    |
| <b>Human hscavirus</b>             | 4 (8)                                       | 1 (8)                |                         | 2 (13)    |                   | 1 (14)                   | 3 (50)                                          |                                   |         |                     |                             | 2 (6)                       | 13    |
| <b>Influenza A virus</b>           | 2 (4)                                       | 1 (8)                | 2 (11)                  |           |                   |                          |                                                 |                                   |         | 1 (33)              | 1 (100)                     | 1 (3)                       | 8     |
| <b>Human metapneumovirus</b>       |                                             |                      |                         | 2 (13)    |                   |                          |                                                 | 1 (33)                            |         |                     |                             | 1 (3)                       | 4     |
| <b>Parainfluenza virus type 1</b>  | 3 (6)                                       | 2 (15)               |                         | 1 (6)     |                   |                          |                                                 |                                   |         | 1 (33)              |                             |                             | 7     |
| <b>Human coronavirus OC43</b>      |                                             |                      |                         |           | 1 (14)            |                          |                                                 |                                   |         |                     |                             | 1 (3)                       | 7     |
| <b>Parainfluenza virus type 3</b>  | 2 (4)                                       | 1 (8)                |                         |           |                   |                          |                                                 |                                   |         |                     |                             | 2 (6)                       | 5     |
| <b>Parainfluenza virus type 4</b>  | 1 (2)                                       |                      | 2 (11)                  |           |                   |                          |                                                 |                                   |         |                     |                             | 1 (3)                       | 4     |
| <b>Human coronavirus NL63</b>      | 4 (8)                                       |                      | 1 (5)                   | 1 (6)     |                   |                          |                                                 |                                   |         |                     |                             | 2 (6)                       | 3     |
| <b>Influenza B virus</b>           |                                             |                      |                         | 1 (6)     |                   |                          |                                                 |                                   |         |                     |                             |                             | 1     |
| <b>Parainfluenza virus type 2</b>  |                                             |                      |                         |           |                   |                          |                                                 |                                   |         |                     |                             | 1 (3)                       | 1     |
| <b>Human coronavirus 229E</b>      |                                             |                      | 1 (5)                   |           |                   |                          |                                                 |                                   |         |                     |                             |                             | 1     |

PICU, paediatric intensive care unit; SARI, severe acute respiratory tract infection; ARTI, acute respiratory tract infection  
 \*Apparent life threatening event (ALTE) in 2 patients, 1 trauma patient
